# Supplementary material
Source: publisher figshare collection journal article supplement (https://gsajournals.figshare.com/articles/dataset/_/19091528)
Supplement: Supplementary file [file 1]

## Supplemental Figure Legends

### Figure S1. Signal peptide prediction for JS

A SignalP-4.1 output predicting the position of the signal peptide in JS protein. The X axis lists the N-terminal residues of JS. The predicted excision position of the signal peptide is marked with the longest vertical red line.

### Figure S2. Amino acid sequence alignment of JS from insects

Clustal Omega alignment output of JS proteins from selected insect species. “mel”: NP\_650538.1 of *Drosophila melanogaster*; “LuciliaCuprina”: XP\_023308467.1 of *Lucilia cuprina*; “StomoxysCalcitrans”: XP\_013099154.1 of *Stomoxys calcitrans*; “CeratitisCapitata”: XP\_012157262.1 of *Ceratitis capitata*; “AedesAegypti”: EAT42245.1 of *Aedes aegypti*; “BombyxMori”: XP\_004927149.1 of *Bombyx mori*; “PlutellaXylostella”: KAG7299243.1 of *Plutella xylostella*.

### Figure S3. JS-mCherry fluorescent signals are distinct from auto fluorescence

Images of the left panel were taken from *js<sup>mCherry</sup>* animals, and shown in triplets. “Green fluorescence” was used to indicate auto-fluorescence. Images on the right were taken from *w<sup>1118</sup>* animals, and shown in triplets. Red signals are the result of auto-fluorescence. Scale bars indicate 100μm.

**Figure S4. JS-EGFP localization in adult eyes**

Images are shown in triplets: GFP fluorescence, brightfield (BF), and the merged image of the two. One of the ocelli is marked with an arrowhead. Scale bars indicate 100 $\mu$ m.

SignalP-4.1 prediction (euk networks): Sequence

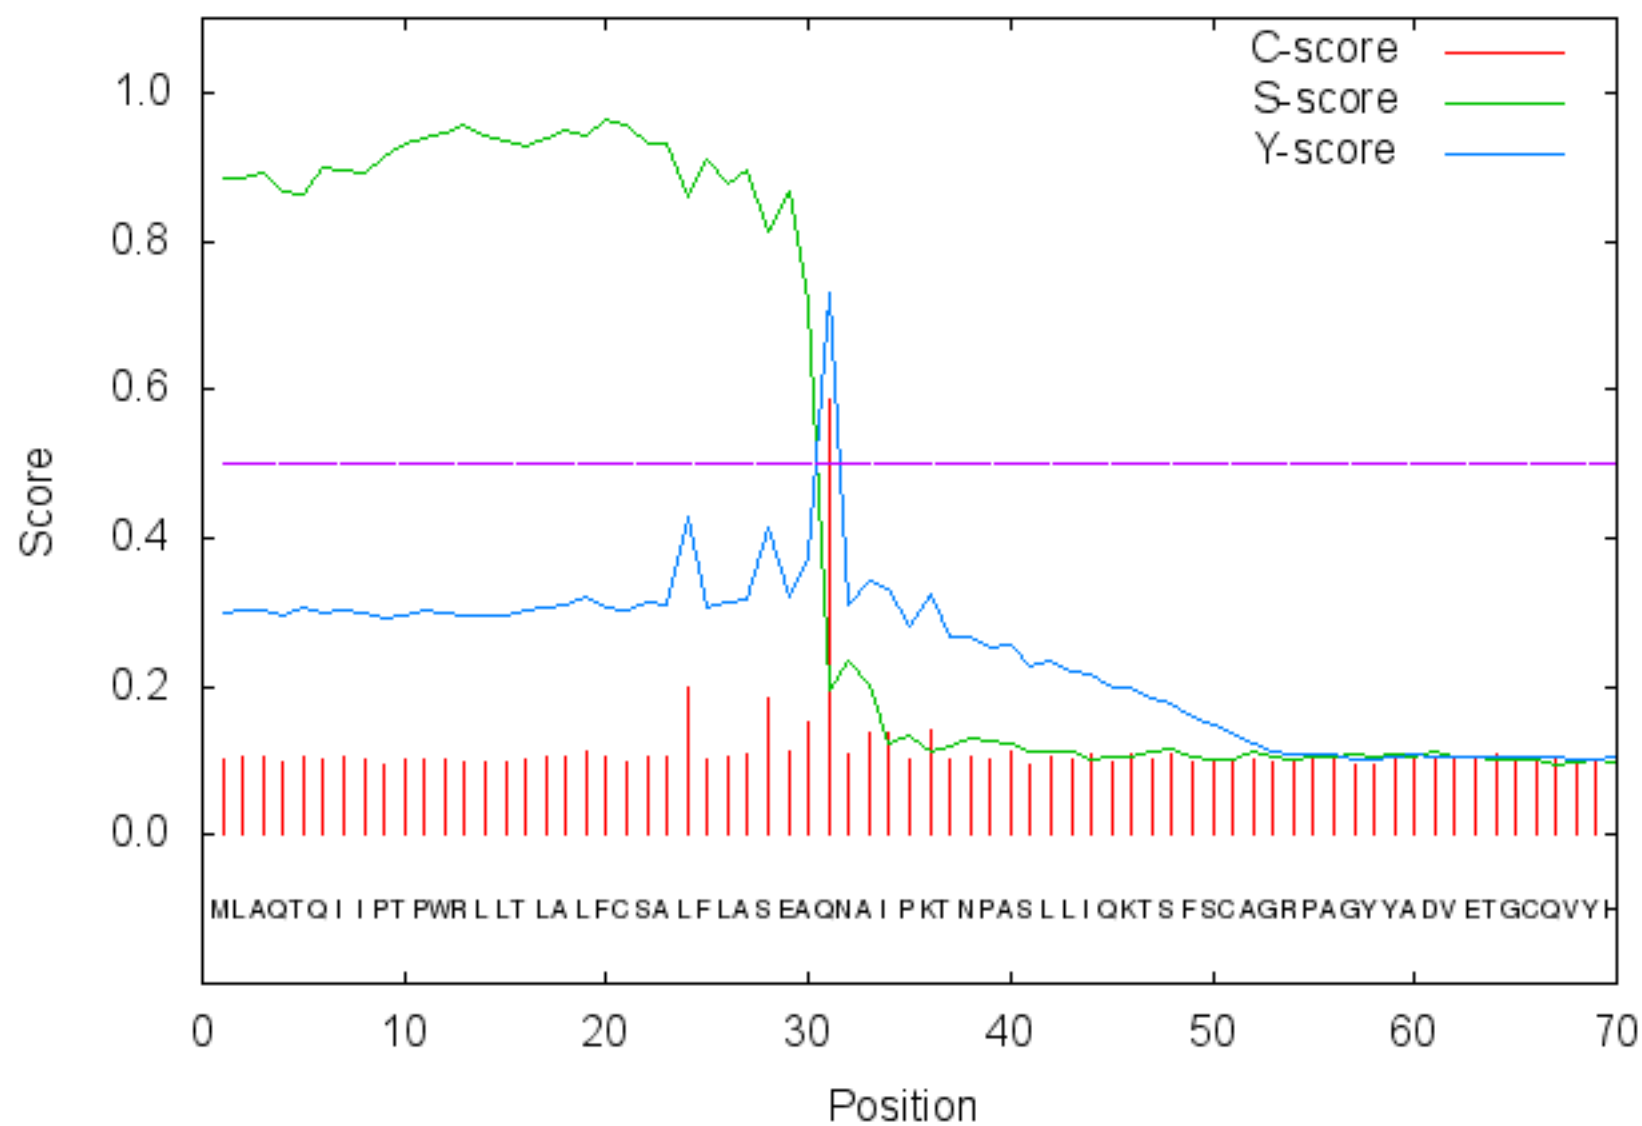

| Species            | Sequence                                                        | Position |
|--------------------|-----------------------------------------------------------------|----------|
| mel                | -----mlaq-----                                                  | 4        |
| LuciliaCuprina     | -----                                                           | 0        |
| StomoxysCalcitrans | -----                                                           | 0        |
| CeratitisCapitata  | -----                                                           | 0        |
| AedesAegypti       | -----malpfqshllpti---n                                          | 14       |
| BombyxMori         | -----                                                           | 0        |
| PlutellaXylostella | meeltkmmkeiqeelveqkvefqgmernittnnnnnnnkfermeikyaelektvtkqee     | 60       |
| mel                | -tqiip-----tpwr-llt---lalfcs--alflaseaqnaipktnpa                | 40       |
| LuciliaCuprina     | ---mvn-----hnwf-latvllwlllc-yhnlcinaagsqnaig---a                | 34       |
| StomoxysCalcitrans | ---mfn-----hnwf-vptvvlsllls-yrnffitaagsqnaig---a                | 34       |
| CeratitisCapitata  | ---mcn-----hnwl-twplliwlltccyflvgidggsenaig---a                 | 35       |
| AedesAegypti       | hnaylaadfrde-----rrylfvss---vfls-----pqrsgvln----dgs            | 49       |
| BombyxMori         | -----macerlcvel--illc---lyciagyags-----dtp                      | 27       |
| PlutellaXylostella | rldmiekqlrkknlvffgveeteknyedlesnlvkiind---kmkvscslse----dvr     | 112      |
| mel                | slligktsfscagrpagyyadvetgcqvvhmedglgrqfsytcptnttlfqgqrmlicdhwy  | 100      |
| LuciliaCuprina     | hrtfqktsfscagrpsagyyadietgcqvvhmedglgrqfsysecpnttlfqgqrmlicdhwy | 94       |
| StomoxysCalcitrans | hrsfgktsfscagrpagyyadvetgcqvvhmedglgrqfsysecpnttlfqgqrmlicdhwy  | 94       |
| CeratitisCapitata  | hrvfektsfscagrpagyyadietgcqvvhmedglgrqfsysecpnttlfqgqrmlicdhwy  | 95       |
| AedesAegypti       | fkfaaktfsfscsgraagyyadvetgcqiyhmedglgrqfsyacpnttlfqgqrmlicdhwy  | 109      |
| BombyxMori         | gvkipptsftrcgraagyyadmetgcqvvhmedglgrrrfsysecpkttlfqgqrmlicdhwy | 87       |
| PlutellaXylostella | dsripatrfsrgrgsgagyyadvetgcqvvhmedglgrqfsytcptnttlfqgqrmlicdhwy | 172      |
| mel                | mvncskaesnyaanlliggrdkpfvndeenslrtprpdllrpyapdysgesfrsqykq-     | 159      |
| LuciliaCuprina     | mvncskaesdytanlliggrdkpfvndeenslrtprpdllrpyapdysgesfrnqyqks     | 154      |
| StomoxysCalcitrans | mvncskaesdytanlliggrdkpfvneeennlrtprpdllrpyapdysgesfrsqyqks     | 154      |
| CeratitisCapitata  | mvncsraesdyaanlliggrdkpfvndeenslrtprpdllrpyapdysgesfrnqyqkq-    | 154      |
| AedesAegypti       | mvncskaesnyaanlliggrdkpfvtddeelnrtprpdlldtpyaagynmds----fkyn    | 165      |
| BombyxMori         | mvncsmaerdydanlliggrdkpfvseemsqrtpdpdilsvpltskyydglkeaeskl      | 147      |
| PlutellaXylostella | mvncsrserdydanlliggrdkpfvsehemqftrtpdpdilsvppnsnyydgkeaesky     | 232      |
| mel                | ft-----snqnqirdesvkgaga-----gksdpqisq-----trwrppppsttilp        | 200      |
| LuciliaCuprina     | ls-----svlnqiydhtaqlmke---ktlgaqqnqlgtgq-----qrwkippssriilp     | 200      |
| StomoxysCalcitrans | ls-----svlnqiydtnsykke---slssnqptqptgq-----qrwkippssriilp       | 200      |
| CeratitisCapitata  | lp-----aiqnqiqdtdaqlkfd---klnt--ipqaapqg-----qhwkipsssttilp     | 198      |
| AedesAegypti       | yfknttgapqnaipangkssvktgtvvpkgttseifeesasnhglpihwstryaked---    | 222      |
| BombyxMori         | l-----hpdndivgvad-----tisgdednildsakqnyrpptswwtrkr--            | 188      |
| PlutellaXylostella | v-----hpgnsivgvad-----slssnnngldhgkqqgyrpptswwtgtgtr--          | 275      |
| mel                | payepqielpsaqsakpr---ipiitsttttttra-----ttttrpttttrattttttt     | 250      |
| LuciliaCuprina     | payepqilees---sakpstrtsyytptitt-----tt-----rkpst-lrptat-t       | 242      |
| StomoxysCalcitrans | payepqipdntvitttaksttrisyynpsttt-----ttttttskpspsl-lrptssns     | 253      |
| CeratitisCapitata  | payeaqttddrasqtnsdnv---rfvpktaqptasskqtkttfnrptpsl-vsa--stq     | 251      |
| AedesAegypti       | ddkerkd--d-----kqeldtplstaipste-eaqlqgsktn-er-----rdvkene       | 266      |
| BombyxMori         | p-----                                                          | 189      |
| PlutellaXylostella | ptsqptr--p-----tpq-----                                         | 286      |

|                    |                                                                |     |
|--------------------|----------------------------------------------------------------|-----|
| mel                | rrppvtarpkealhnrrpnfge-----h-----dmddlgtsh                     | 282 |
| LuciliaCuprina     | knqstkfnvnvaalhnrhdehlq-----l-----ehddlgtsh                    | 274 |
| StomoxysCalcitrans | rslgtrfngvaalhnrgdehlq-----y-----elddlgtsh                     | 285 |
| CeratitisCapitata  | vqpinrfnn-aalhqr---gqs-----n-----epedlgtsh                     | 279 |
| AedesAegypti       | nrttvrvnakekqsnrveeaasnnnqvnkvpsiryeppftpeeqvkrsgasketlgagf    | 326 |
| BombyxMori         | ---nvqinnid---slagaasq---epgptirpqpes-----                     | 217 |
| PlutellaXylostella | --apsgidaqd---nlagaasq---kptptygtlpdf-----                     | 315 |
|                    |                                                                |     |
| mel                | stryntsadfnsaesplretkqsst-----                                 | 307 |
| LuciliaCuprina     | stryntsadfnsaedrfaaktqkatt-prkstynsnfnnaft-----                | 315 |
| StomoxysCalcitrans | stryntsadfnnsnedrngknrgknaytttkssfg--lttlrt-----               | 325 |
| CeratitisCapitata  | stryntsadfnsaegpnsktasvsnknkissfivppatastt-----ttttrpvtpt      | 333 |
| AedesAegypti       | -kpfesilnfknkgnrkd--ydfsnlfgnesirntppaqtptpasttprtigssttrf     | 383 |
| BombyxMori         | -----rdtslk-----n-----kgnqperelmppllp--stteae----              | 245 |
| PlutellaXylostella | -----sdfnqn-----tgvpnsrpvsppqtqdlrppeap--ttteqp----            | 349 |
|                    |                                                                |     |
| mel                | -----kltkfikppskiyepffvypiylnleesqtq-                          | 337 |
| LuciliaCuprina     | ---takptt-----ttkkttlnpkikvpskiyeppllypiynmddnta--             | 355 |
| StomoxysCalcitrans | ---ttstst-----sttkatanpnikipskiyepvlfpiynledsstt               | 367 |
| CeratitisCapitata  | assklttst-----ssaaittnlpikipskvyepvyypiyneetvst-               | 378 |
| AedesAegypti       | fssssttprsrsttrfsstsrqtgfvststgttqkpisiivsdllqppqlnpaqsprtgp-- | 441 |
| BombyxMori         | -----d-----datttgssvyqfikir-----fdpnspd--                      | 268 |
| PlutellaXylostella | -----sseeydld-----irmknssedpvfqqfikir-----fdpnspd--            | 381 |
|                    |                                                                |     |
| mel                | -naavattlrtstaapfspvpsrke-vstttrprlsrptttagvpfssathpttvttv--   | 393 |
| LuciliaCuprina     | -tttmrptfrastaspfvtrvsat-ts-ttttkapttrpttvigkpfrssfstst---k    | 408 |
| StomoxysCalcitrans | ttttvrplfrastaapfmtrqttt-ttrptttrpps rattmlgkpfrsssitapt---t   | 423 |
| CeratitisCapitata  | ----qlplrassatpftvsptltrlsttppvppsrptttagkpfaapssgittkapnf     | 433 |
| AedesAegypti       | --afrpavt--taaprstftata-ttttttpr---pltlsdpr---g-snrapttilf     | 487 |
| BombyxMori         | --siktait-----gseiidl---nkhlp---ggvssegqvsse-dertpkk---        | 307 |
| PlutellaXylostella | --slkttmt-----aseilni---nqqlpq---gqd-----vste-eertpr--         | 415 |
|                    |                                                                |     |
| mel                | ----g-----vpprsdnrtppaqsfrlatptstaa-----                       | 420 |
| LuciliaCuprina     | v---gtnsnnidrfdvsklskeirtppaaggfkpptptppvknsrtsqnstynkp-----   | 460 |
| StomoxysCalcitrans | t---tqsgnlnrfdadklskelrtppaaggfkptprptvsafnts-----             | 467 |
| CeratitisCapitata  | g---grsqnnliqnsfthnskdvrtpaaggfkpptprplstttsatkstesspfdysi     | 490 |
| AedesAegypti       | nppaataglfenrfalqrpvtskvpvpsrdilppf--gnvanfdkiknrfv-----       | 537 |
| BombyxMori         | -----nksfgnklnfdk-----tdndkkf--regtrfsvntk-----                | 338 |
| PlutellaXylostella | -----gknrgnnfntlg-----tekrkgn--teqnrftintk-----                | 446 |
|                    |                                                                |     |
| mel                | -----ppsrpaqlpfndllppfv                                        | 439 |
| LuciliaCuprina     | -----drsgvkheqpskqllpllad                                      | 480 |
| StomoxysCalcitrans | -----ksiaesvpskhllpllv                                         | 485 |
| CeratitisCapitata  | pttnrlhlptpiintasstn-----tgtaaatsdatppsaskellpppyqe            | 534 |
| AedesAegypti       | --seaiftrqpitnepssgpiksgidklqgdvqiqrndnvprpfsvptpandllppkke    | 595 |
| BombyxMori         | -----pnptennt-----egdsqvkskvpkpeqvllppkkd                      | 369 |
| PlutellaXylostella | -----ptaptplpdtnnfsgn-----dnsgqrstglsepdkhllppksd              | 486 |

\* : \*\*\*\* :



|                    |                                                                           |     |
|--------------------|---------------------------------------------------------------------------|-----|
| mel                | fvph-diattgppiiyyewk--vpsngleppkldppigvdgreypettgdygvtskqdvf              | 496 |
| LuciliaCuprina     | fith-dvattgppiiyyewk--vpsdgleppkldspigvdgreypetvidynsistnngf              | 537 |
| StomoxysCalceitans | fvqh-dvattgppiiyyewk--vpsdgleppkmevpigvdgrqypetvldynsisasgtf              | 542 |
| CeratitisCapitata  | fvqh-diattgppiiyyewk--vpsngleppkldppigvdgreypepsfdyntisgaseg              | 591 |
| AedesAegypti       | yvfy-ddattkppiiyyqkwksipsfgleppldapltdeek--llt-----                       | 638 |
| BombyxMori         | ysqspldsttmppiiyyewkwavpafgllppkegnitnsta--lp-----                        | 412 |
| PlutellaXylostella | yavi--psttvppvyyewkwavpafdlplagnstdnst--aae-----                          | 528 |
|                    | +        *        *        *        *        *        *        *        * |     |

|                    |                                                             |     |
|--------------------|-------------------------------------------------------------|-----|
| mel                | ntrlndigshqkppvqitsplqgsstshrlaisrsikpkeegasq-----          | 542 |
| LuciliaCuprina     | tsi-ssfgidqkrsnntsksenktivpsrspiarsiketggpkgvnetkak----tsnt | 591 |
| StomoxysCalcitrans | spn-phfgidqkkevdsr-----ptlrpptsrsvketaqpngvstrrka----dkpt   | 589 |
| CeratitisCapitata  | knt-qt---aksnssptdkvasdksqtartpiarsiketgqpsvhrvvvestkatstt  | 647 |
| AedesAegypti       | --q-----lnpasqdspdsnrehnqtarsiss----etgnpgenp-----sts       | 675 |
| BombyxMori         | -----tkspk--tgkspfs-tarrtti-----kaeda-----                  | 436 |
| PlutellaXylostella | --v-----pqgrsns--ggnrpfs-nwrptt-----eep-----                | 553 |

|                    |                                                            |     |
|--------------------|------------------------------------------------------------|-----|
| mel                | -----rrsdvvasstdishlrkqflipeyafpletigr--tgygpgagaaagsgssng | 594 |
| LuciliaCuprina     | sptrastttqkssnpgdifqirkelsvpeyafplenvgr--tgyl-----dt       | 636 |
| StomoxysCalceitans | k--atgtaptssnepedifqiskdlsvpeyafplenvgr--tgyl-----ds       | 632 |
| CeratitisCapitata  | tpvatdrsdtsaptsditqlrrdysvpeylfplesagr--tgyl-----st        | 692 |
| AedesAegypti       | ntiaeanrkriqlpthnylelrkqlaipdfthplessagtaqsvye-----ge      | 722 |
| BombyxMori         | ----tpkprnve-----ynissyyvpdyvfpldkp--hpgye-----sd          | 469 |
| PlutellaXylostella | ----dlnpnsve-----ynissyfvpdyqfpldkp--hpgye-----de          | 586 |

|                    |                                                        |     |
|--------------------|--------------------------------------------------------|-----|
| mel                | dlynsfqlkipeqra-----kwfgenpkcpechpsfvlpgtcepcirr--     | 637 |
| LuciliaCuprina     | dvynsfqlkiperra-dtdehwhwygenpkcpechpsvvrpgtcepcirr--   | 685 |
| StomoxysCalcitrans | dvynsfqlkiperra-dtdehlhwfgenpkcpechpsvvrpgtcepcirr--   | 681 |
| CeratitisCapitata  | dsynsfqlkiperehgeeeiedhrhwfgenpkcpechpsfvlpgtcepcirr-- | 742 |
| AedesAegypti       | gavnsfqikipayar-sdddsrawygenakcpqchpafmrpgscepckirr    | 773 |
| BombyxMori         | daqtsfqvqvsr-----pgrssygenpkcpqchpaylkgpscepckivr      | 513 |
| PlutellaXylostella | naetsfqvkvgr-----pgr-sfgenpncphchpaylnpgtcepcivkr-     | 629 |

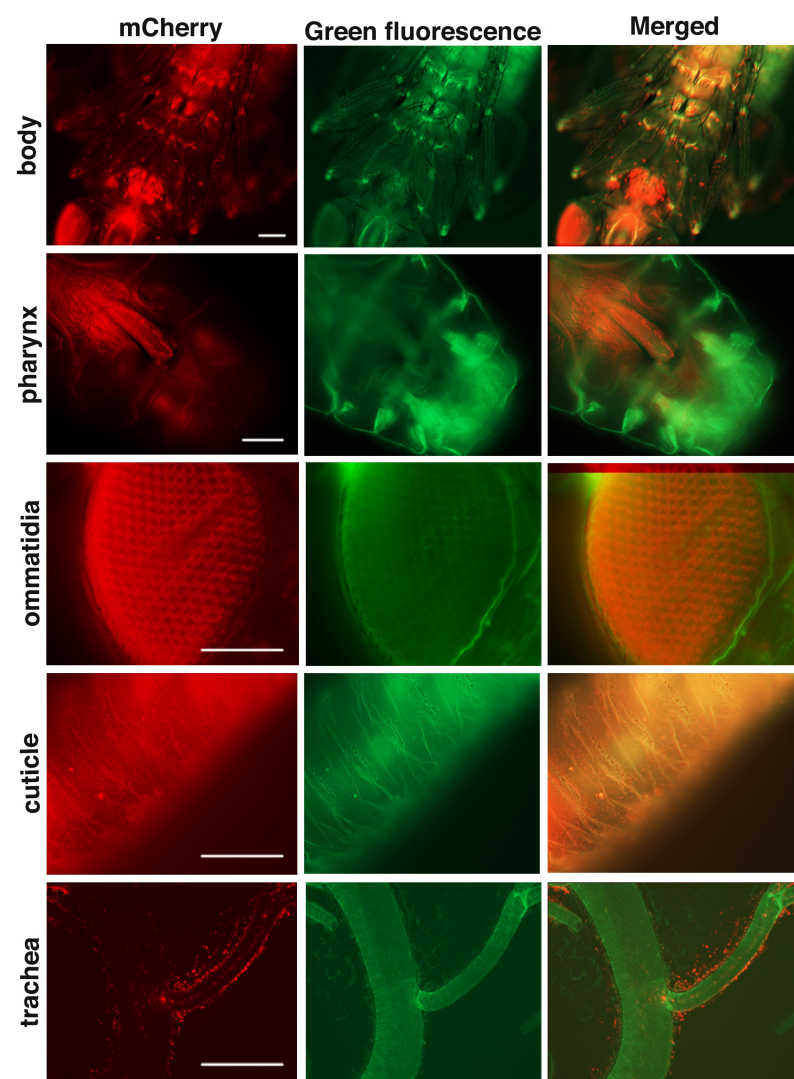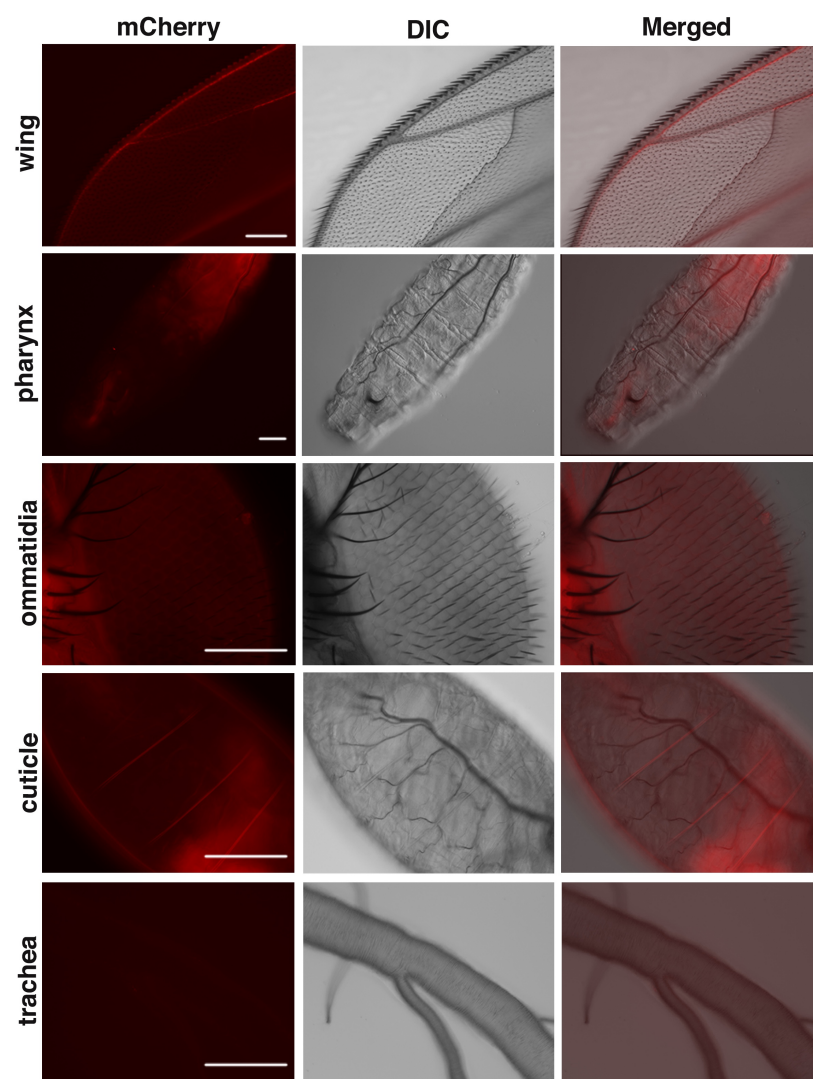

**EGFP**

**BF**

**Merged**

**ocelli**

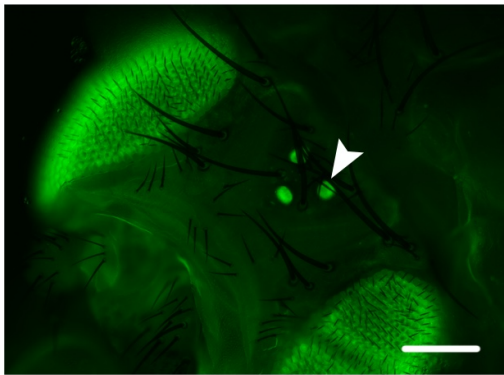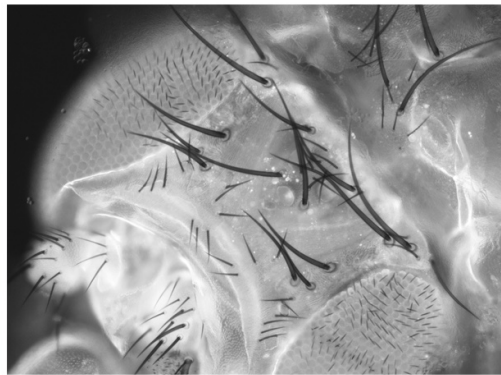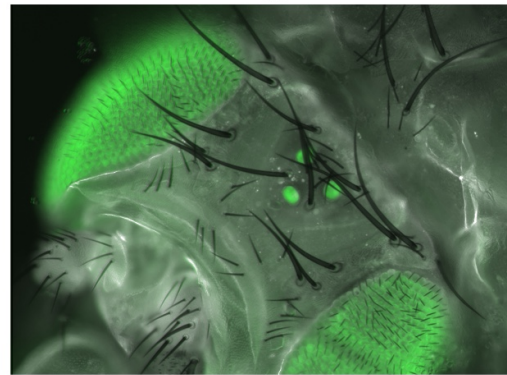

**ommatidia**

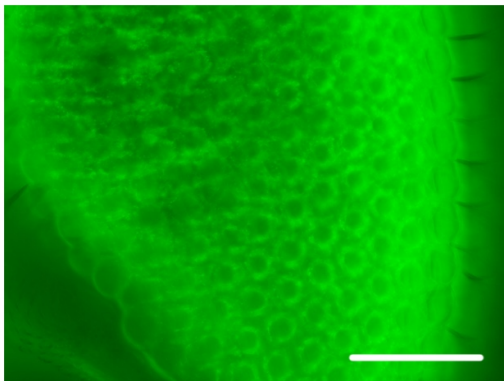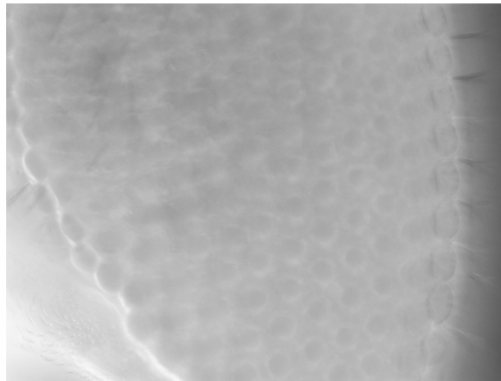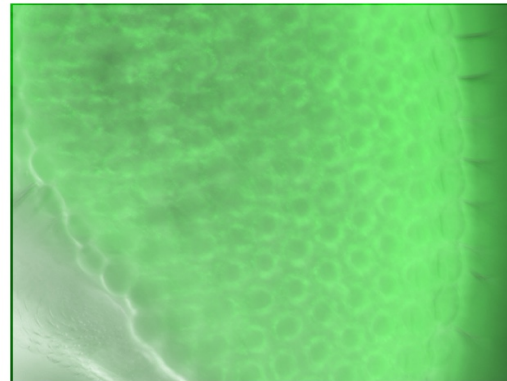



Table S1. Amino acid compositions of Mucin-D and JS<sup>4</sup>

| Amino acid composition <sup>1</sup> | Mucin-D <sup>2</sup> | JS <sup>3</sup> |
|-------------------------------------|----------------------|-----------------|
| Asp+Asn                             | 7.5                  | 8.3             |
| Thr                                 | 11.5                 | 11.4            |
| Ser                                 | 10.8                 | 9.5             |
| Glu+Gln                             | 10.5                 | 10.1            |
| Pro                                 | 7.3                  | 11.6            |
| Gly                                 | 15                   | 5.1             |
| Ala                                 | 8.4                  | 7.1             |
| Cys                                 | 1.5                  | 1.7             |
| Val                                 | 4                    | 4               |
| Met                                 | 1.1                  | 0.7             |
| Ile                                 | 2.2                  | 4.3             |
| Leu                                 | 5.5                  | 6               |
| Tyr                                 | 1.4                  | 3.5             |
| Phe                                 | 3.5                  | 3.6             |
| Lys                                 | 4.6                  | 4.3             |
| His                                 | 0.9                  | 1.7             |
| Arg                                 | 3.3                  | 7               |

<sup>1</sup>: Three letter abbreviations of analyzed residues

<sup>2</sup>: The amino acid composition of Mucin-D was taken from Kramerov et al. (1996) as “number of residues per 100 amino acids”.

<sup>3</sup>: Calculated amino acid composition of JS protein with the predicted signal peptide residues not included in the calculation.

<sup>4</sup>: A spearman correlation test yields  $r_s = 0.8135$ ,  $p(2\text{-tailed})=7\text{E-}05$ .

Table S2. Primer list

| Primer name                                        | Sequence                                                                 |
|----------------------------------------------------|--------------------------------------------------------------------------|
| <b>Construct of pUAST-<i>js</i> cDNA</b>           |                                                                          |
| 14880cDNA FP                                       | ATGTTGGCACAAACGCAAATTATCC                                                |
| 14880cDNA RP                                       | CTATCTGCGCAGGCAGGGCT                                                     |
| <b>Pet28a-JS antigen</b>                           |                                                                          |
| pet28a-EcoRI-14880cDNA FP                          | ATCTATGAATTCATGTTGGCACAAACGC                                             |
| pet28a-HindIII-14880cDNA RP                        | ATCTATAAAGCTTCTATCTGCGCAGGCAGG                                           |
| <b>pUAST-<i>js</i> cDNA-dsRED</b>                  |                                                                          |
| 14880-cDNA-dsRED YJ FP                             | GTTCTGCCGGGCACCTGCGAGCCCTGCCTGCGCAGAGGC<br>GGAGGGGCCTCCTCCGAGAACGTCATCAC |
| 14880cDNA YJ RP                                    | TCTGCGCAGGCAGGGCTCGCAGGTG                                                |
| <b>N-terminal gRNA primer</b>                      |                                                                          |
| ATG -gRNA-FP                                       | GTCGAGAACAATCGTCGAAATGT                                                  |
| ATG-gRNA-RP                                        | AAACACATTTGACGATTGTTCT                                                   |
| <b>C-terminal gRNA primer</b>                      |                                                                          |
| TAG-gRNA-FP                                        | GTCGGAATCAGGACTATCTGCGC                                                  |
| TAG-gRNA-RP                                        | AAACGCGCAGATAGTCCTGATTC                                                  |
| <b><i>Js</i><sup>3-1</sup> insert fragment PCR</b> |                                                                          |
| 14880-w <sup>+</sup> -FP-2                         | ATCCGATGTCGACTCCAACC                                                     |
| 14880-exon2-RP-1                                   | CGAATTGCGAACCGTCAGAT                                                     |

## Sequencing results

### (1) CRSPR/Cas9 induced *js* mutations

In the sequences below, the start codon **ATG** is in bold.

TGCCACAGAGAACAATCGTCGAA**ATG**TTGGCACAAACGCAAA     *wt*  
TGCCACAGAGAACAATCGTC-----GCACAAACGCAAA     *js<sup>cas-1</sup>*

TGCCACAGAGAACAATCGTCGAA**ATG**TTGGCACAAACGCAAA     *wt*  
TGCCACAGAGAACAACAATCG-----**TG**TTGGCACAAACGCAAA     *js<sup>cas-2</sup>*

In the sequences below, the stop codon **TAG** is in bold.

CACCTGCGAGCCCTGCCTGCGCAGAT**TAG**TCCTGATTCCAT     *wt*  
CACCTGCGAGCCCTGCCTGC-----**G**TCCTGATTCCAT     *js<sup>c-term</sup>*

### (2) *P* element in *js<sup>3-1</sup>* (imprecise excision)

**Sequences in bold are from the 5'UTR of CG14880.** Sequence underlined is the 5' end of *P* element. *Sequences in italic are part of the origin of the yeast 2micron plasmid.*

**GACTAGTGACATGATGTGCTAAAGTGTTGATGGCATGTCCATGATGAAATAACATAA**  
GGTGGTCCCGTCGATAGCCGAAGCTTACCGAAGTATACACTTAAATTCAGTGCACGT  
TTGCTTGTTGAGAGGAAAGGTTGTGTGCGGACGAATTTTTTTTGAAAACATTAACC  
CTTACGTGGAATAAAAAAATGAAATATTGCAATTTTGCTGCAAAGCTGTGACTGG  
AGTAAATTAATTCACGTGCCGAAGTGTGCTATTAAGAGAAAATTGTGGGAGCAGAG  
CCTTGGGTGCAGCCTTGGTGAAAACTCCCAAATTTGTGATACCCACTTTAATGATTC  
GCAGTGGAAGGCTGCACCTGCAAAGGTCAGACATTTAAAGGAGGCGACTCAAC  
GCAGATGCCGTACCTAGTAAAGTGATAGAGCCTGAACCAGAAAAGATAAAAGAAGG  
CTATACCAGTGGGAGTACACAAACAGAGTAAGTTTGAATAGTAAAAAAAATCATTAT  
GTAAACAATAACGTGACTGTGCGTTAGGTCCTGTTCAATTGTTTAATGAAAATAAGAGC  
TTGAGGGGAAAAAATTCGTACTTTGGAGTACGAAATGCGTCGTTTAGAGCAGCAGCC  
GAATTCCACGGACTATAGACTATACTAGTATACTCCGTCTACTGTACGATACACTTCC  
GCTCAGGTCCTTGTCTTTAACGAGGCCTTACCACTCTTTTGTTACTCTATTGATCCA  
GCTCAGCAAAGGCAGTGTGATCTAAGATTCTATCTTCGCGATGTAGTAAAACTAGCT  
AGACCGAGAAAGAGACTAGAAATGCAAAAGGCACTTCTACAATGGCTGCCATCATT  
TTATCCGATGTGACGCTGCAGCTTCTCAATGATATTCTGAATACGCTTTGAGGAGATAC  
AGCCTAATATCCGACAACTGTTTACAGATTACGATCGTACTGGTACCCATCATGAT  
TTTGACATCGACCTGGGAGTTTCCCTGAAACAGATAGTATAATTGACTGTATAATAATA  
TATAGTCTAGCGCTTACCGAGACATGATTGTATTTGCTCTGGAAAACTATGCATCATG  
CATAGGTATCTTGG

### (3) *js* knock-in alleles

In the sequences below, small letters represent genomic sequences from *js*, LARGE LETTERS REPRESENT CODING SEQUENCES FOR FLUORESCENT PROTEINS.

*js<sup>mcherry</sup>*

ccaccctttgtgtaccccatctacaatctagaagagtcccagaccagaacgcggcagtcgccaccacactgcgcacat  
caacggcgggtcctttcagtcctgttccaagtcgcaaggaggtcagcaccacaactccacgaccactgagtcgaccgac  
gaccttggccggtgtacccttctcctctgccacacaccaactacggttacgacggtcggagtaccgccacgcagcgata  
atcggactccagctccggcccagagcttccgcctggccacgcccaccagcactgcagcaccaccatcgcgcccggca  
cagttgcccttcaacgatttactgccgcccgttcgttgactttgtgccccacgatatagccaccaccaaggaccgcctatctat  
tacgaatggaagggtgccctcgaacggtcttgagcctcccaaattagaccacccattggtgtggatggacgtgagtatccc  
gagaccactggagactacggggtcaccagcaagcaggatgtattcaacacccgactaaacgatattggaagccatcaa  
aagaagccagtccagataacctcgccgctccaacagtcgagcacaagccatcgttggccatctcgagatccattaagc  
ccaaagaggagcaggaatcggcacagcggcgatccgatgtggtggccagctccacggatataagccatctgcgcaag  
caattcctcattccggagtacgccttcccgttgaaaccattgggcgacggttatggtcctggtgcaggagcagcggct  
gggggctccggctccagcaacggcgatctgtataactcgttccagctgaagatccccgagcagcgcgctaagtgggtcgg  
agagaaccccaagtgcccgagtgcctccttcgttcgttctgccgggcacctgcgagccctgctgcgcagaGGCG  
GAGGGGTGAGCAAGGGCGAGGAGGATAACATGGCCATCATCAAGGAGTTCATGCG  
CTTCAAGGTGCACATGGAGGGCTCCGTGAACGGCCACGAGTTCGAGATCGAGGG  
CGAGGGCGAGGGCCGCCCTACGAGGGCACCCAGACCGCCAAGCTGAAGGTGA  
CCAAGGGTGGCCCCCTGCCCTTCGCCTGGGACATCCTGTCCCCTCAGTTCATGTA  
CGGCTCCAAGGCCTACGTGAAGCACCCCGCCGACATCCCCGACTACTTGAAGCTG  
TCCTTCCCCGAGGGCTTCAAGTGGGAGCGCGTGATGAACTTCGAGGACGGCGGC  
GTGGTGACCGTGACCCAGGACTCCTCCTTGACAGGACGGCGAGTTCATCTACAAGG  
TGAAGCTGCGCGGCACCAACTTCCCCTCCGACGGCCCCGTAATGCAGAAGAAGAC  
CATGGGCTGGGAGGCCTCCTCCGAGCGGATGTACCCCGAGGACGGCGCCCTGAA  
GGGCGAGATCAAGCAGAGGCTGAAGCTGAAGGACGGCGGCCACTACGACGCTGA  
GGTCAAGACCACCTACAAGGCCAAGAAGCCCGTGACGCTGCCCGGCGCCTACAAC  
GTCAACATCAAGTTGGACATCACCTCCCACAACGAGGACTACCCATCGTGGAACA  
GTACGAACGCGCCGAGGGCCGCACTCCACCGGCGGCATGGACGAGCTGTACAA  
GGGGCGCGCCTAGtcttgattccatatccattcccgtctccgtccgtcccatcgccattatccgcatccgcatctgc  
tactagccctagtattagcttccgctgagaagtcccggagtgaagcatccacgcatttattgtatatccgcagattaattattaa  
actacacaaatatgtttgtgaatgatttattcgctgtggtcgtgggtcatttgtgaattttatatgcaaagaatatctttatgagt  
taggctaagatatttcatggggtaacctaaaaaatttgattattaactcttgatagccaattttcacagttgttaaaattgagac  
accactgaaacttgcgaactcgaaattgggcagtcacaccgtaatatatttctgtcttatggttttagatcaattttcggtttt  
tcaaaatttattcagatcagtaaaatacagtattatgggggactgcgcagatgcaaaattagttagtcgagttacgggtgcca  
ccaataccgaaacttggcgacatgcacatgtattgggtgtggcgaatgctgattaaatcatatttggatgctataggcttttg  
tctggaaatcacccaaaggaggaatatatatactgttaataaatatggtggttaaatctgcacaattcgttattttaagagcg  
cccatataaaaatttgtgctgctgagcacgttggaatatgggttgtaagaagggaatacagatgaaatgagcagcaggtcc  
atttctgaagatctcgaggaacgatatgctatcactaacaatgacaaacgaggtcagttggcaatggatagatttatttaa  
atcaataagatttgttttattagactctatgtacaacttttgattgctgcctggattactactgtagtgaataaatctcaaaactca  
atatataattatataatttataaaatttggtgaaaattgtcgatctcggacggttggaattatattcatttaaaatttgcattggttaa



gcatgcataaaattgtacaaaacacatcacactagcttaaatctactttcaatgaaattatattttaaatatcaaccgaagtc  
cgggaaatatacc

*js<sup>egfp</sup>*

ccaccctttgtgtaccccatctacaatctagaagagtcccagacccagaacgcggcagtcgccaccacactgcgcacat  
caacggcggctcctttcagtcctgttccaagtcgcaaggaggtcagcaccacaactccacgaccactgagtcgaccgac  
gaccttggccggtgtacccttctcctctgccacacaccaactacggttacgacggtcggagtagccgccacgcagcgata  
atcggactccagctccggcccagagcttccgcctggccacgcccaccagcactgcagcaccaccatcgcgcccgga  
cagttgcccttcaacgatttactgccgcccgttctgtgactttgtgccccacgatatagccaccaccaaggaccgcctatctat  
tacgaatggaaggtgccctcgaacggtcttgagcctcccaaattagaccacccattggtgtggatggacgtgagtatccc  
gagaccactggagactacggggtcaccagcaagcaggatgtattcaacacccgactaaacgatattggaagccatcaa  
agaagccagtcagataaacctcgccgctccaacagtcgagcacaagccatcgtttgccatctcgagatccattaagc  
ccaaagaggagcaggaatcggcacagcggcgatccgatgtgtgtggccagctccacggatataagccatctgcgcaag  
caattcctcattccggagtacgccttcccgtggaaccattgggcgacgggttatggtcctggtgcaggagcagcggt  
gggggctccggctccagcaacggcgatctgtataactcgttccagctgaagatccccgagcagcgcgctaagtgttcgg  
agagaaccccaagtgcccgagtgccatccttcgttctgtccgggcacctgcgagccctgcctgcgcagaGGGC  
GCGCCAGCAAGGGCGAGGAGCTGTTACCGGGGTGGTGCCCATCCTGGTCGAGC  
TGGACGGCGACGTAAACGGCCACAAGTTCAGCGTGTCCGGCGAGGGCGAGGGCG  
ATGCCACCTACGGCAAGCTGACCCTGAAGTTCATCTGCACCACCGGCAAGCTGCC  
CGTGCCCTGGCCCAACCCTCGTGACCACCCTGACCTACGGCGTGCAAGTGTCTCAGC  
CGCTACCCCGACCACATGAAGCAGCACGACTTCTTCAAGTCCGCCATGCCCGAAG  
GCTACGTCCAGGAGCGCACCATCTTCTTCAAGGACGACGGCAACTACAAGACCCG  
CGCCGAGGTGAAGTTCGAGGGCGACACCCTGGTGAACCGCATCGAGCTGAAGGG  
CATCGACTTCAAGGAGGACGGCAACATCCTGGGGCACAAGCTGGAGTACAACCTAC  
AACAGCCACAACGTCTATATCATGGCCGACAAGCAGAAGAACGGCATCAAGGTGAA  
CTTCAAGATCCGCCACAACATCGAGGACGGCAGCGTGCAAGCTCGCCGACCACTAC  
CAGCAGAACACCCCATCGGCGACGGCCCCGTGCTGCTGCCCCGACAACCACTAC  
CTGAGCACCCAGTCCGCCCTGAGCAAAGACCCCAACGAGAAGCGCGATCACATGG  
TCCTGCTGGAGTTCGTGACCGCCGCGGGGATCACTCTCGGCATGGACGAGCTGTA  
CAAGTAGtcttgattcatatccattcccgtctccgtccgtcccatcgccattatccgcatccgcatctgtactagcccta  
gtattagcttccgtgagaagtcccggagtgaagcatccacgcattattgtatatccgcagattaattattaaactacaaa  
atatgttttgtaatgattatttcgcctgtggtcgtgggtcattgtgtaatttatatgcaaagaatatctttatgagtaggctaag  
atatttcatgggtaacctaaaaaatttgattattaactcttgatagccaattttcacagttgttaaaattgagacaccactgaa  
actttcgaactcgaaatttgggcagtcacaccgtaatgatatttctgtctttatggtttttagatcaattttcggtttttcaaaatttat  
tcagatcagtaaaatacagtattatgggggactgcgcagatgaaaattagttagtcgagttacggtgccaccaataaccga  
aacttggcgacatgcacatgtattgggtgtggcgaatgctgattaaatcatatttgatgctataggcttttggtctggaaatca  
cccaaaggaggtaatatatactgttaataaataatggtggttaaatctgcacaattcgttattttaagagcgccatacaaaa  
atttgtctgctgagcacgttgaaatatgggttgtaagaagggaatacgtatgaaatgagcagcaggtccattttcgaagat  
ctcgaggaacgatatgctatcactaacaatgacaaacgaggtcagttggcaatggatagattttttaaaatcaataagatt  
tgtttttagactctatgtacaacttttgattgtgcctggattactactgtagtgaataaaatctcaaactcaatatataattata  
tatattataaaatttggtgaaaattgtcgatctcggacgggttgatattatcatttaaaatttgcattggttaagcatgcataaa  
attgtacaaaacacatcacactagcttaaatctactttcaatgaaattatattttaaatatcaaccgaagtcccgggaaatata  
cc

ccaccctttgtgtaccccatctacaatctagaagagtcccagacccagaacgcggcagtcgccaccacactgcgcacat  
caacggcgggtcctttcagtcctgttccaagtcgcaaggaggtcagcaccacaactccacgaccactgagtcgaccgac  
gaccttggccggtgtaccttctcctctgccacacaccaactacggttacgacggtcggagtaccgccacgcagcgata  
atcggactccagctccggcccagagcttccgcctggccacgcccaccagcactgcagcaccaccatcgcgcccggca  
cagttgcccttcaacgatttactgccgcccgttcgttgactttgtgccccacgatatagccaccaccaaggaccgcctatctat  
tacgaatggaagggtgccctcgaacgggtcttgagcctcccaaattagaccacccattgggtgtggatggacgtgagtatccc  
gagaccactggagactacggggtcaccagcaagcaggatgtattcaacacccgactaaacgatattggaagccatcaa  
aagaagccagtcagataacctcgccgctccaacagtcgagcacaagccatcgttggccatctcgagatccattaagc  
ccaaagaggagcaggaatcggcacagcggcgtatccgatgtgtggcagctccacggatataagccatctgcgcaag  
caattcctcattccggagtacgccttcccgtggaacattggggcgcacgggttatggctcgtgtgcaggagcagcggct  
gggggctccggctccagcaacggcgtatctgtataactcgttcagctgaagatccccgagcagcgcgctaagtgggtcgg  
agagaaccccaagtgcgcggagtgcctccttcgttcgttctgccgggcacctgcgagccctgcctgcgcagaATGGC  
CTCCTCCGAGAACGTCATCACCGAGTTCATGCGCTTCAAGGTGCGCATGGAGGGC  
ACCGTGAACGGCCACGAGTTCGAGATCGAGGGCGAGGGCGAGGGCCGCCCTAC  
GAGGGCCACAACACCGTGAAGCTGAAGGTGACCAAGGGCGGCCCCCTGCCCTTC  
GCCTGGGACATCCTGTCCCCCAGTTCAGTACGGCTCCAAGGTGTACGTGAAGC  
ACCCCGCCGACATCCCCGACTACAAGAAGCTGTCCTTCCCCGAGGGCTTCAAGTG  
GGAGCGCGTGATGAACTTCGAGGACGGCGGCGTGCGGACCGTGACCCAGGACTC  
CTCCCTGCAGGACGGCTGCTTCATCTACAAGGTGAAGTTCATCGGCGTGAACTTCC  
CCTCCGACGGCCCCGTGATGCAGAAGAAGACCATGGGCTGGGAGGCCTCCACCG  
AGCGCCTGTACCCCCGCGACGGCGTGCTGAAGGGCGAGACCCACAAGGCCCTGA  
AGCTGAAGGACGGCGGCCACTACCTGGTGGAGTTCAAGTCCATCTACATGGCCAA  
GAAGCCCGTGCAGCTGCCCGGCTACTACTACGTGGACGCCAAGCTGGACATCACC  
TCCCACAACGAGGACTACACCATCGTGGAGCAGTACGAGCGCACCGAGGGCCGC  
CACCACCTGTTCTGTAGTccttgattccatattcccgctcctcgctcccattatccgcacatccgc  
atctgctactagccctagtagttagcttccgctgagaagtcccggagtgaagcatccacgcatttattgtatatccgcagattaa  
ttattaaactacacaaatatgtttgtgaatgatttatttcgcctgtggtcgtgggtcatttgtgtaattttatatgcaaagaatatcttt  
atgagttaggctaagatatttcatgggtaacctaaaaaatttgattattaactcttgatagccaattttcacagttgttaaatt  
gagacaccactgaaactttcgaactcgaatttgggcagtcacaccgtaatgatatttctgtctttatgggttttagatcaatttt  
cggtttttcaaaatttattcagatcagtaaaatacagtattatgggggactgcgcagatgcaaatttagttagtcgagttacg  
gtgccaccaataccgaaacttggcgacatgcacatgtattgggtgtggcgaatgctgattaaatcatatttggatgctatagg  
tctttggtctggaaatcacccaaaggaggtaatatatactgttaataaatatgggtggttaaatctgcacaattcgttatttta  
gagcgcccatacaaaatttgtgctgctgagcacgttggaaatatgggttgtaagaagggaatacgaatgagcagc  
agggtccattttcgaagatctcgaggaacgatatgctatcactaacaatgacaaacgaggtcagttggcaatggatagatt  
atttaaaatcaataagatttgttttatttagactctatgtacaacttttgattgctgcctggattactactgtagttaataaatctca  
aacttcaatatataattatataattataaaatttggtgaaaattgtcgatctcggacgggttgatattatcatttaaaatttgc  
atggtgaagcatgcataaaattgtacaaaacacatcacactagcttaaatctactttcaatgaaattatatttaaatatcaacc  
gaagtcccgggaaatatacc

#### (4) *js* overexpression constructs

##### *UAS-js*

In the sequences below, small letters represent pUAST sequence. LARGE LETTERS REPRESENT JS CDNA SEQUENCE.

acaggcggcagctgacagctaaacaatctgcagtaaagtgaagttaaagtgaatcaattaaagtaaccagcaacca  
agtaaataactgcaactactgaaatctgccaagaagtaattattgaatacaagaagagaactctgaataggggaattggg  
aatcgttaacagatctgATGTTGGCACAAACGCAAATTATCCCAACGCCTTGGCGACTTTTG  
ACCCTGGCTTTATTCTGCTCAGCTTTATTTTTGGCCAGTGAGGCTCAAAATGCCATC  
CCAAAAACGAATCCTGCCTCGCTGCTGATACAGAAGACATCCTTCTCCTGCGCCGG  
ACGTCCAGCCGGATATTATGCGGATGTGGAGACGGGCTGCCAGGTGTACCACATGT  
GCGATGGCCTGGGTGCGCCAGTTCAGCTACACCTGCCCAAACACGACACTTTTCCA  
GCAGCGAATGCTTATCTGCGACCACTGGTACATGGTGAAGTGTCCAAGGCGGAG  
AGCAACTATGCTGCCAATCTCCTAATTGGTCAGCGGGACAAGCCCTTCGTAAACGA  
CGAGGAAAACAGCTTGCGCACTCCAAGACCCGATCTTCTGGATCGTCCTTATGCGC  
CCGACTATTCCGGCGAGTCCTTCAGAAGCCAATATAAGCAGTTTACTTCCAACCAGA  
ATCAGATACGTGATGAGTCCGTCAAAGGAGCCGGTGCGGGTAAATCGGATCCCCA  
GATATCGCAGACGCGTTGGCGCATTCCACCACCCAGCCGGACGATCCTTCCACCG  
GCCTATGAACCGCAAATCGAGCTGCCCAGTGCCCAATCGGCCAAGCCCAGGATAC  
CCATTATCACTAGCACCAACCACAACCACTCGAGCGACCAACCACCCGACCAACA  
ACCACAACCTCGTGCCACCACCACAACAACAACCACTCGAAGACCTCCGGTAACCG  
CCAGGCCGAAGGAGGCCTTGACAACAGGCGGCCAAATTTCCAGGAGCATGATAT  
GGATGACTTGGGCACCAGCCACAGCACACGGTACAACACCTCGGCAGACTTCAAC  
TCGGCGGAGTCGCCGCTCCGTGAAACGAAACAGTCCAGCACCAAGCTGACCAAGT  
TCATCAAGCCGCCGTCCAAGATCTATGAGCCACCCTTTGTGTACCCCATCTACAATC  
TAGAAGAGTCCCAGACCCAGAACGCGGCAGTCGCCACCACACTGCGCACATCAAC  
GGCGGCTCCTTTCAGTCCTGTTCCAAGTCGCAAGGAGGTCAGCACCAACAACCTCCA  
CGACCACTGAGTCGACCGACGACCTTGGCCGGTGTACCCTTCTCCTCTGCCACAC  
ACCCAACCTACGGTTACGACGGTTCGGAGTACCGCCACGCGAGCGATAATCGGACTCC  
AGTCCGGCCCAGAGCTTCCGCCTGGCCACGCCCACCAGCACTGCAGCACCAACC  
ATCGCGCCCGGCACAGTTGCCCTTCAACGATTTACTGCCGCCGTTTCGTTGACTTTG  
TGCCCCACGATATAGCCACCACCCAAGGACCGCCTATCTATTACGAATGGAAGGTG  
CCCTCGAACGGTCTTGAGCCTCCCAAATTAGACCCACCCATTGGTGTGGATGGACG  
TGAGTATCCCGAGACCACTGGAGACTACGGGGTCACCAGCAAGCAGGATGTATTCA  
ACACCCGACTAAACGATATTGGAAGCCATCAAAGAAGCCAGTCCAGATAACCTCG  
CCGCTCCAACAGTCGAGCACAAGCCATCGTTTGGCCATCTCGAGATCCATTAAGCC  
CAAAGAGGAGCAGGAATCGGCACAGCGGCGATCCGATGTGGTGGCCAGCTCCAC  
GGATATAAGCCATCTGCGCAAGCAATTCTCATTCCGGAGTACGCCTTCCCGCTGG  
AAACCATTGGGCGCACGGGTTATGGTCCTGGTGCAGGAGCAGCGGCTGGGGGCT  
CCGGCTCCAGCAACGGCGATCTGTATAACTCGTTCCAGCTGAAGATCCCCGAGCA  
GCGCGCTAAGTGGTTCGGAGAGAACCCCAAGTGCCCGGAGTGCCATCCTTCGTTT  
GTTCTGCCGGGCACCTGCGAGCCCTGCCTGCGCAGATAGggatctttgtgaaggaaccttactt  
ctgtggtgtgacataattggacaaactacctacagagatttaaagctctaaggtaaataaaaatttttaagtgtataatgtgt  
aaactactgattctaattgtttgtatttttagattccaacctatggaactgatgaatgggagcagtggtggaatgccttaatga  
gaaaccgtgtccgaag

## *UAS-js-dsRED*

In the sequences below, small letters are pUAST sequence. LARGE LETTERS ARE JS CDNA SEQUENCE. Underlined letters are dsRED sequence.

agctaaacaatctgcagtaaagtgaagttaaagtgaatcaattaaaagtaaccagcaaccaagtaaataactgcaac  
tactgaaatctgccaagaagtaattattgaatacaagaagagaactctgaatagggaattggaattcgtaacagatctg  
smaATGTTGGCACAAACGCAAATTATCCCAACGCCTTGGCGACTTTTGACCCTGGCT  
TTATTCTGCTCAGCTTTATTTTTTGGCCAGTGAGGCTCAAATGCCATCCCAAAAACG  
AATCCTGCCTCGCTGCTGATACAGAAGACATCCTTCTCCTGCGCCGGACGTCCAGC  
CGGATATTATGCGGATGTGGAGACGGGCTGCCAGGTGTACCACATGTGCGATGGC  
CTGGGTGCGCCAGTTCAGCTACACCTGCCCAAACACGACACTTTTCCAGCAGCGAAT  
GCTTATCTGCGACCACTGGTACATGGTGAAGTCTCCAAGGCGGAGAGCAACTATG  
CTGCCAATCTCCTAATTGGTCAGCGGGACAAGCCCTTCGTAAACGACGAGGAAAAC  
AGCTTGCGCACTCCAAGACCCGATCTTCTGGATCGTCCTTATGCGCCCGACTATTC  
CGGCGAGTCCTTCAGAAGCCAATATAAGCAGTTTACTTCCAACCAGAATCAGATACG  
TGATGAGTCCGTCAAAGGAGCCGGTGCGGGTAAATCGGATCCCCAGATATCGCAG  
ACGCGTTGGCGCATTCCACCACCCAGCCGGACGATCCTTCCACCGGCCTATGAAC  
CGCAAATCGAGCTGCCCAGTGCCCAATCGGCCAAGCCCAGGATACCCATTATCACT  
AGCACCAACCACAACCACTCGAGCGACCACCAACCCGACCAACAACCACAACCTC  
GTGCCACCACCACAACAACAACCACTCGAAGACCTCCGGTAACCGCCAGGCCGAA  
GGAGGCCTTGCACAACAGGCGGCCAAATTTCCAGGAGCATGATATGGATGACTTGG  
GCACCAGCCACAGCACACGGTACAACACCTCGGCAGACTTCAACTCGGCGGAGTC  
GCCGCTCCGTGAAACGAAACAGTCCAGCACCAAGCTGACCAAGTTCATCAAGCCG  
CCGTCCAAGATCTATGAGCCACCCTTTGTGTACCCCATCTACAATCTAGAAGAGTCC  
CAGACCCAGAACGCGGCAGTCGCCACCACACTGCGCACATCAACGGCGGGCTCCT  
TTCAGTCCTGTTCCAAGTCGCAAGGAGGTCAGCACCACAACTCCACGACCACTGA  
GTCGACCGACGACCTTGGCCGGTGTACCCTTCTCCTCTGCCACACACCCAACTAC  
GGTTACGACGGTCGGAGTACCGCCACGCAGCGATAATCGGACTCCAGCTCCGGCC  
GAGAGCTTCCGCCTGGCCACGCCACCAGCACTGCAGCACCAACCATCGCGCCCG  
GCACAGTTGCCCTTCAACGATTTACTGCCGCCGTTTCGTTGACTTTGTGCCCCACGA  
TATAGCCACCACCCAAGGACCGCCTATCTATTACGAATGGAAGGTGCCCTCGAACG  
GTCTTGAGCCTCCCAAATTAGACCCACCCATTGGTGTGGATGGACGTGAGTATCCC  
GAGACCACTGGAGACTACGGGGTCAACAGCAAGCAGGATGTATTCAACACCCGAC  
TAAACGATATTGGAAGCCATCAAAAGAAGCCAGTCCAGATAACCTCGCCGCTCCAA  
CAGTCGAGCACAAAGCCATCGTTTGGCCATCTCGAGATCCATTAAGCCCAAAGAGGA  
GCAGGAATCGGCACAGCGGCATCCGATGTGGTGGCCAGCTCCACGGATATAAGC  
CATCTGCGCAAGCAATTCCTCATTCCGGAGTACGCCTTCCCGCTGGAAACCATTGG  
GCGCACGGGTTATGGTCCTGGTGCAGGAGCAGCGGCTGGGGGCTCCGGCTCCAG  
CAACGGCGATCTGTATACTCGTTCCAGCTGAAGATCCCCGAGCAGCGCGCTAAGT  
GGTTCGGAGAGAACCCCAAGTGCCCGGAGTGCCATCCTTCGTTTCGTTCTGCCGGG  
CACCTGCGAGCCCTGCCTGCGCAGAGGCGGAGGGAGGTCTTCCAAGAATGTTATC  
AAGGAGTTCATGAGGTTTAAGGTTTCGCATGGAAGGAACGGTCAATGGGCACGAGTT



TGAAATAGAAGGCGAAGGAGAGGGGAGGCCATACGAAGGCCACAATACCGTAAAG  
CTTAAGGTAACCAAGGGGGGACCTTTGCCATTTGCTTGGGATATTTTGTCAACCACAA  
TTTCAGTATGGAAGCAAGGTATATGTCAAGCACCTGCCGACATACCAGACTATAAA  
AAGCTGTCATTTCTGAAGGATTTAAATGGGAAAGGGTCATGAACTTTGAAGACGGT  
GGCGTCGTTACTGTAACCCAGGATTCCAGTTTGCAGGATGGCTGTTTCATCTACAA  
GGTCAAGTTCATTGGCGTGAACCTTTCCTTCCGATGGACCTGTTATGCAAAAGAAGA  
CAATGGGCTGGGAAGCCAGCACTGAGCGTTTGTATCCTCGTGATGGCGTGTTGAA  
AGGAGAGATTCATAAGGCTCTGAAGCTGAAAGACGGTGGTCATTACCTAGTTGAATT  
CAAAAGTATTTACATGGCAAAGAAGCCTGTGCAGCTACCAGGGTACTACTATGTTGA  
CTCCAAACTGGATATAACAAGCCACAACGAAGACTATACAATCGTTGAGCAGTATGA  
AAGAACCGAGGGACGCCACCATCTGTTCTTTAGggatcttgtgaaggaaccttactctgtggtgt  
gacataattggacaaactacctacagagatttaaagctctaaggtaaataaaaattttaagtgtataatgtgttaaactact  
gattctaattgttgtatttttagattccaacctatggaactgatgaatgggagcagtggtggaat

### *UAS-jsΔCBD-I-dsRED*

In the sequences below, small letters are pUAST sequence. LARGE LETTERS ARE JS CDNA SEQUENCE. Underlined letters are dsRED sequence.

agctaaacaatctgcagtaaagtgcaagttaaagtgatcaattaaaagtaaccagcaaccaagtaaataactgcaac  
tactgaaatctgccaagaagtaattattgaatacaagaagagaactctgaatagggaattgggaattcggttaacagatctg  
smaATGTTGGCACAAACGCAAATTATCCCAACGCCTTGGCGACTTTTGACCCTGGCT  
TTATTCTGCTCAGCTTTATTTTTGGCCAGTGAGGCTCAAATGCCATCCCAAAAACG  
AATCCTGCCTCGCTGCTGATACAGAAGACATCCTTCTCCTGCGCCGGACGTCCAGC  
CGGATATTATGCGGATGTGGAGACGGGCGGGCGCGCCGATGGCCTGGGTGCGCA  
GTTTCAGCTACACCTGCCCCAACACGACACTTTTCCAGCAGCGAATGCTTATCTGCG  
ACCACTGGTACATGGTGAACCTGCTCCAAGGCGGAGAGCAACTATGCTGCCAATCTC  
CTAATTGGTCAGCGGGACAAGCCCTTCGTAAACGACGAGGAAAACAGCTTGCGCA  
CTCCAAGACCCGATCTTCTGGATCGTCCTTATGCGCCCGACTATTCCGGCGAGTCC  
TTCAGAAGCCAATATAAGCAGTTTACTTCCAACCAGAATCAGATACGTGATGAGTCC  
GTCAAAGGAGCCGGTGCGGGTAAATCGGATCCCCAGATATCGCAGACGCGTTGGC  
GCATTCCACCACCCAGCCGGACGATCCTTCCACCGGCCTATGAACCGCAAATCGA  
GCTGCCCAGTGCCCAATCGGCCAAGCCCAGGATACCCATTATCACTAGCACCACCA  
CAACCACTCGAGCGACCACCACCCGACCAACAACCACAACCTCGTGCCACCAC  
CACAACAACAACCACTCGAAGACCTCCGGTAACCGCCAGGCCGAAGGAGGCCTTG  
CACAACAGGCGGCCAAATTTCCAGGAGCATGATATGGATGACTTGGGCACCAGCCA  
CAGCACACGGTACAACACCTCGGCAGACTTCAACTCGGCGGAGTCGCCGCTCCGT  
GAAACGAAACAGTCCAGCACCAAGCTGACCAAGTTCATCAAGCCGCCGTCCAAGA  
TCTATGAGCCACCCTTTGTGTACCCCATCTACAATCTAGAAGAGTCCCAGACCCAGA  
ACGCGGCAGTCGCCACCACACTGCGCACATCAACGGCGGCTCCTTTCAGTCCTGT  
TCCAAGTCGCAAGGAGGTCAGCACCACTCCACGACCACTGAGTCGACCGACG  
ACCTTGCCGGTGTACCCTTCTCCTCTGCCACACACCCAACTACGGTTACGACGGT  
CGGAGTACCGCCACGCAGCGATAATCGGACTCCAGCTCCGGCCGAGAGCTTCCGC  
CTGGCCACGCCCACCAGCACTGCAGCACCAACCATCGCGCCCGGCACAGTTGCC

TTCAACGATTTACTGCCGCCGTTTCGTTGACTTTGTGCCCCACGATATAGCCACCACC  
 CAAGGACCGCCTATCTATTACGAATGGAAGGTGCCCTCGAACGGTCTTGAGCCTCC  
 CAAATTAGACCCACCCATTGGTGTGGATGGACGTGAGTATCCCGAGACCACTGGAG  
 ACTACGGGGTCAACCAGCAAGCAGGATGTATTCAACACCCGACTAAACGATATTGGA  
 AGCCATCAAAAGAAGCCAGTCCAGATAACCTCGCCGCTCCAACAGTCGAGCACAA  
 GCCATCGTTTGGCCATCTCGAGATCCATTAAGCCCAAAGAGGAGCAGGAATCGGCA  
 CAGCGGCGATCCGATGTGGTGGCCAGCTCCACGGATATAAGCCATCTGCGCAAGC  
 AATTCCTCATTCCGGAGTACGCCTTCCCGCTGGAAACCAATTGGGCGCACGGGTTAT  
 GGTCTTGGTGCAGGAGCAGCGGCTGGGGGCTCCGGCTCCAGCAACGGCGATCTG  
 TATAACTCGTTCCAGCTGAAGATCCCCGAGCAGCGCGCTAAGTGGTTCGGAGAGAA  
 CCCCAAGTGCCCGGAGTGCCATCCTTCGTTTCGTTCTGCCGGGCACCTGCGAGCCC  
 TGCCTGCGCAGAGGCGGAGGGAGGTCTTCCAAGAATGTTATCAAGGAGTTCATGA  
GGTTTAAGGTTTCGCATGGAAGGAACGGTCAATGGGCACGAGTTTGAAATAGAAGGC  
GAAGGAGAGGGGAGGCCATACGAAGGCCACAATACCGTAAAGCTTAAGGTAACCA  
AGGGGGGACCTTTGCCATTTGCTTGGGATATTTTGTCAACCACAATTTTCAGTATGGAA  
GCAAGGTATATGTCAAGCACCTTGCCGACATACCAGACTATAAAAAGCTGTCATTTT  
CTGAAGGATTTAAATGGGAAAGGGTCATGAACTTTGAAGACGGTGGCGTCGTTACT  
GTAACCCAGGATTCCAGTTTGCAGGATGGCTGTTTCATCTACAAGGTCAAGTTCATT  
GGCGTGAACTTTCCTTCCGATGGACCTGTTATGCAAAAGAAGACAATGGGCTGGGA  
AGCCAGCACTGAGCGTTTGTATCCTCGTGATGGCGTGTTGAAAGGAGAGATTCTATA  
AGGCTCTGAAGCTGAAAGACGGTGGTCATTACCTAGTTGAATTCAAAAGTATTTACA  
TGGCAAAGAAGCCTGTGCAGCTACCAGGGTACTACTATGTTGACTCCAAACTGGAT  
ATAACAAGCCACAACGAAGACTATACAATCGTTGAGCAGTATGAAAGAACCGAGGG  
ACGCCACCATCTGTTTCTTTAGggatctttgtgaaggaaccttacttctgtggtgtgacataattggacaaact  
 acctacagagatttaaagctctaaggtaaataaaaattttaagtgtataatgtgttaaactactgattctaattgtttgtgtattt  
 agattccaacctatggaactgatgaatgggagcagtggtggaat

# *UAS-jsΔCBD-II-dsRED*

In the sequences below, small letters are pUAST sequence. LARGE LETTERS ARE JS  
 CDNA SEQUENCE. Underlined letters are dsRED sequence.

agctaaacaatctgcagtaaagtgcaagttaaagtgaatcaattaaaagtaaccagcaaccaagtaaataactgcaac  
 tactgaaatctgccaagaagtaattattgaatacaagaagagaactctgaataggggaattgggaattcgtaacagatctg  
 smaATGTTGGCACAACGCAAATTATCCCAACGCCTTGGCGACTTTTGACCCTGGCT  
 TTATTCTGCTCAGCTTTATTTTTGGCCAGTGAGGCTCAAAATGCCATCCCCAAAACG  
 AATCCTGCCTCGCTGCTGATACAGAAGACATCCTTCTCCTGCGCCGGACGTCCAGC  
 CGGATATTATGCGGATGTGGAGACGGGCTGCCAGGTGTACCACATGTGCGATGGC  
 CTGGGTGCGCAGTTCAGCTACACCTGCCCAAACACGACACTTTTCCAGCAGCGAAT  
 GCTTATCGGGCGCGCCTCCAAGGCGGAGAGCAACTATGCTGCCAATCTCCTAATTG  
 GTCAGCGGGACAAGCCCTTCGTAAACGACGAGGAAAACAGCTTGCGCACTCCAAG  
 ACCCGATCTTCTGGATCGTCCTTATGCGCCCGACTATTCCGGCGAGTCCTTCAGAA  
 GCCAATATAAGCAGTTTACTTCCAACCAGAATCAGATACGTGATGAGTCCGTCAAAG  
 GAGCCGGTGCGGGTAAATCGGATCCCCAGATATCGCAGACGCGTTGGCGCATTCC

ACCACCCAGCCGGACGATCCTTCCACCGGCCTATGAACCGCAAATCGAGCTGCCC  
AGTGCCCAATCGGCCAAGCCCAGGATACCCATTATCACTAGCACCACCACAACCAC  
TCGAGCGACCACCACCACCCGACCAACAACCACAACCTCGTGCCACCACCACAACA  
ACAACCACCTCGAAGACCTCCGGTAACCGCCAGGCCGAAGGAGGCCTTGCACAACA  
GGCGGCCAAATTTCCAGGAGCATGATATGGATGACTTGGGCACCAGCCACAGCAC  
ACGGTACAACACCTCGGCAGACTTCAACTCGGCGGAGTCGCCGCTCCGTGAAACG  
AAACAGTCCAGCACCAAGCTGACCAAGTTCATCAAGCCGCCGTCCAAGATCTATGA  
GCCACCCCTTTGTGTACCCCATCTACAATCTAGAAGAGTCCCAGACCCAGAACGCGG  
CAGTCGCCACCACACTGCGCACATCAACGGCGGCTCCTTTTCAGTCCTGTTCCAAG  
TCGCAAGGAGGTCAGCACCACTCCACGACCACTGAGTCGACCGACGACCTTG  
GCCGGTGTACCCTTCTCCTCTGCCACACACCCAACTACGGTTACGACGGTCGGAG  
TACCGCCACGCAGCGATAATCGGACTCCAGCTCCGGCCGAGAGCTTCCGCCTGGC  
CACGCCACCAGCACTGCAGCACCAACATCGCGCCCGGCACAGTTGCCCTTCAAC  
GATTTACTGCCGCCGTTTCGTTGACTTTGTGCCCCACGATATAGCCACCACCCAAGG  
ACCGCCTATCTATTACGAATGGAAGGTGCCCTCGAACGGTCTTGAGCCTCCCAAAT  
TAGACCCACCCATTGGTGTGGATGGACGTGAGTATCCCGAGACCACTGGGAGACTAC  
GGGGTCACCAGCAAGCAGGATGTATTCAACACCCGACTAAACGATATTGGAAGCCA  
TCAAAGAAGCCAGTCCAGATAACCTCGCCGCTCCAACAGTCGAGCACAAGCCATC  
GTTTGGCCATCTCGAGATCCATTAAGCCCAAAGAGGAGCAGGAATCGGCACAGCG  
GCGATCCGATGTGGTGGCCAGCTCCACGGATATAAGCCATCTGCGCAAGCAATTCC  
TCATTCCGGAGTACGCCTTCCCGCTGGAAACCATTTGGGCGCACGGGTTATGGTCCT  
GGTGCAGGAGCAGCGGCTGGGGGCTCCGGCTCCAGCAACGGCGATCTGTATAAC  
TCGTTCCAGCTGAAGATCCCCGAGCAGCGCGCTAAGTGGTTCGGAGAGAACCCCA  
AGTGCCCGGAGTGCCATCCTTCGTTCTGTCGGGGCACCTGCGAGCCCTGCCT  
GCGCAGAGGCGGAGGGAGGTCTTCCAAGAATGTTATCAAGGAGTTCATGAGGTTTA  
AGGTTTCGCATGGAAGGAACGGTCAATGGGCACGAGTTTGAAATAGAAGGCGAAGG  
AGAGGGGAGGCCATACGAAGGCCACAATACCGTAAAGCTTAAGGTAACCAAGGGG  
GGACCTTTGCCATTTGCTTGGGATATTTTGTACCACAATTTTCAGTATGGAAGCAAG  
GTATATGTCAAGCACCTGCCGACATACCAGACTATAAAAAGCTGTCATTTCTGAA  
GGATTTAAATGGGAAAGGGTCATGAACCTTTGAAGACGGTGGCGTCGTTACTGTAAC  
CCAGGATTCCAGTTTGCAGGATGGCTGTTTCATCTACAAGGTCAAGTTCATTGGCGT  
GAACTTTCTTCCGATGGACCTGTTATGCAAAAGAAGACAATGGGCTGGGAAGCCA  
GCACTGAGCGTTTGTATCCTCGTGATGGCGTGTTGAAAGGAGAGATTCATAAGGCT  
CTGAAGCTGAAAGACGGTGGTCATTACCTAGTTGAATTCAAAGTATTTACATGGCA  
AAGAAGCCTGTGCAGCTACCAGGGTACTACTATGTTGACTCCAACTGGATATAACA  
AGCCACAACGAAGACTATACAATCGTTGAGCAGTATGAAAGAACCGAGGGACGCCA  
CCATCTGTTCTTTAGggatctttgtgaaggaaaccttacttctgtggtgtgacataattggacaaactacctacaga  
gatttaaagctctaaggtaaataaaaattttaagtgtataatgtgttaaactactgattctaattgttgtatttttagattccaa  
cctatggaactgatgaatgggagcagtggtggaat
